# Supplementary material for: A Novel Oral Astaxanthin Nanoemulsion from Haematococcus pluvialis Induces Apoptosis in Lung Metastatic Melanoma
Source: PubMed Central journal article supplement (PMC7471791; doi:10.1155/2020/2647670), 2020-08-26
Supplement: 2647670.f1.pdf [file 2647670.f1.pdf]

2 **A novel oral astaxanthin nanoemulsion induces apoptosis**  
3 **in lung metastatic melanoma**

4  
5 **Hsing-Yu Haung**<sup>1,†</sup>, **Yi-Chen Wang**<sup>2,†</sup>, **Ying-Chen Cheng**<sup>1</sup>, **Wenyi Kang**<sup>3</sup>, **Dengyong Liu**  
6 **<sup>4</sup>**, **Chaogeng Xiao**<sup>5</sup>, **Hui-Min David Wang**<sup>1,6,7,8\*</sup>

7  
8 1 Graduate Institute of Biomedical Engineering, National Chung Hsing University,  
9 Taichung City 402, Taiwan

10 2 Division of Cardiology, Department of Internal Medicine, Kaohsiung Armed Forces General  
11 Hospital, Taichung City 411, Taiwan.

12 3 National R & D Center for Edible Fungus Processing Technology, Henan University,  
13 Kaifeng 475004, China

14 4 College of Food Science and Technology, Bohai University; National & Local Joint  
15 Engineering Research Center of Storage, Processing and Safety Control Technology for  
16 Fresh Agricultural and Aquatic Products, Jinzhou 121013, China

17 5 Food Science Institute, Zhejiang Academy of Agricultural Sciences, Hangzhou 310021,  
18 PR China

19 6 Graduate Institute of Medicine, College of Medicine, Kaohsiung Medical University,  
20 Kaohsiung City 807, Taiwan

21 7 Department of Medical Laboratory Science and Biotechnology, China Medical  
22 University, Taichung City 404, Taiwan

23 8 College of Food and Biological Engineering, Jimei University, Xiamen, 361021, China

24 † These authors contributed equally to this work.

25 \* Correspondence: Hui-Min David Wang, Ph.D. davidw@dagon.nchu.edu.tw; Mobil:  
26 886-935753718; Tel.: 886-4-22840733#651; Fax: 886-4-22852242

27

28

29 **Table S1.** The primer sequences used in this study.

30

---

|                                          |
|------------------------------------------|
| <i>Bcl-2</i>                             |
| Forward: 5'-GTATTGGTGAGTCGGATTGCAA-3'    |
| Reverse: 5'-TGCTGCATTGTTCCCGTAGAG-3'     |
| <i>Caspase-9</i>                         |
| Forward: 5'-TCTGGGACGCTCTGCTGAGT-3'      |
| Reverse: 5'-CTCGGGTCTCAAGGTCTGTGA-3'     |
| <i>Caspase-3</i>                         |
| Forward: 5' -CAGTGGGACTGATGAGGAGATG-3'   |
| Reverse: 5' -CGACCCGTCCTTTGAATTTTC-3'    |
| <i>ATM</i>                               |
| Forward: 5'-GACAACAAGAAGGAGTCGAATAACC-3' |
| Reverse: 5'-GCTTACTTCTGATGGAGTGGATGAT-3' |
| <i>p21</i>                               |
| Forward: 5'-TCTGAGCGGCCTGAAGATTC-3'      |
| Reverse: 5'-CAATCTGCGCTTGGAGTGATAG-3'    |
| <i>Cyclin D1</i>                         |
| Forward: 5'-GAGGCGGATGAGAACAAGCA-3'      |
| Reverse: 5'-CTCCCAGCAGCTACCATGGA-3'      |
| <i>NF-κB</i>                             |
| Forward: 5'-TATGTGTGTGAAGGCCCATCA-3'     |
| Reverse: 5'-ACCACTGAACGATAACCTTTGC-3'    |
| <i>ERK</i>                               |
| Forward: 5'-CGACCACGTTTCAGTTTCTCATC-3'   |
| Reverse: 5'-TCTTCGTTACAGCTAGGTTGCT-3'    |
| <i>MMP-9</i>                             |
| Forward: 5'-TCGCGTGGATAAGGAGTTCTC-3'     |
| Reverse: 5'-GGAAACTCACACGCCAGAAGA-3'     |

---

31

32

33 **Figure S1.** Tumor developments and TAP-nanoemulsion regimen administration *in vivo*.

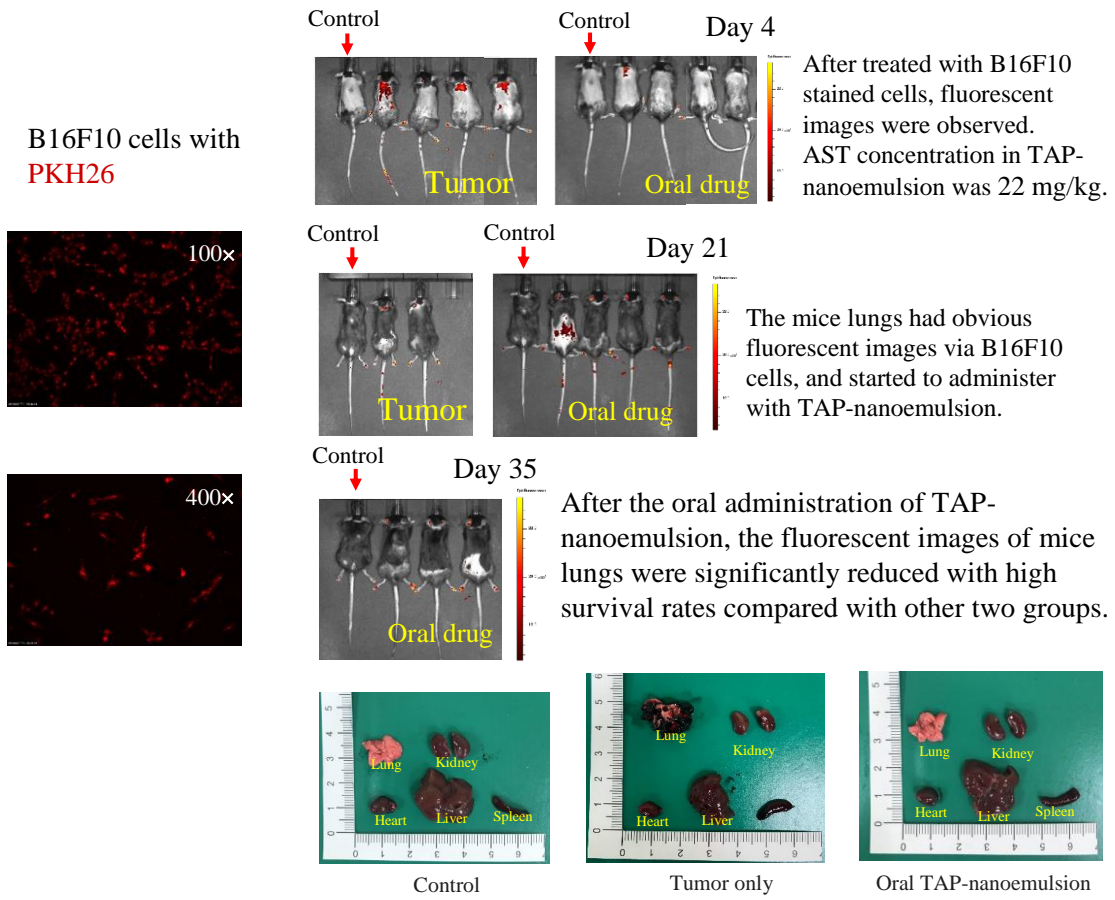

36 Figure S2. IRB certificate of human foreskin fibroblasts [KMUHIRB-2014-07-07 (I)].

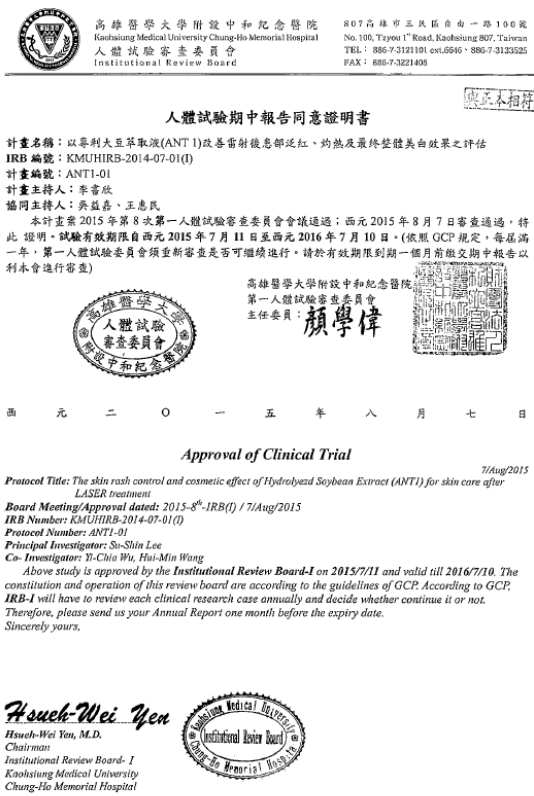

高雄醫學大學附設中和紀念醫院  
Kaohsiung Medical University Chung-Ho Memorial Hospital  
人體試驗審查委員會  
Institutional Review Board

807 高雄市三民區自由一路100號  
No. 100, Tzyou 1<sup>st</sup> Road, Kaohsiung 807, Taiwan  
TEL: 886-7-3121101 ext.6646, 886-7-3123255  
FAX: 886-7-3221408

99231040804021

高雄醫學大學附設中和紀念醫院 函(稿)

地址: 80756 高雄市三民區自由一路100號  
承辦人: 人體試驗審查委員會-吳淑瑛  
電話: (07)3121101 分機 6646 轉 37  
傳真: (07)3221408

受文者: 如正副本行文單位

發文日期: 中華民國 104 年 8 月 17 日 (請血填寫)  
發文字號: 高醫附委字第 1040003737 號  
類別: 普通件  
密等及解密條件或保密期限:  
附件: 見主旨

主旨: 本院整型外科李書欣醫師主持之「以專利大豆萃取液(ANT 1)改善雷射後患部泛紅、灼熱及最終整體美白效果之評估」(IRB 編號: KMUHIRB-2014-07-01(I), 計畫編號: ANTI-01) 臨床試驗期中報告申請通過證明, 請核備。

說明:  
一、本業於高醫第一人體試驗審查委員會 2015 年第 8 次(2015/8/7)會議審核通過, 同意本臨床試驗之執行有效期限至: 2016/7/10。  
二、本院計畫主持人請於證書有效期限到期前一個月繳交期中報告; 臨床試驗計畫結束或中止後三個月內繳交結案或中止報告。如發生不良反應事件時須依相關法規填妥表格送相關單位(IRB), 以上相關資料請自本院人委會網站中下載。

正本: 衛生福利部食品藥物管理署(期中報告同意證明書影本)、本院計畫主持人: 李書欣醫師(修訂計畫同意書正本) 簽印  
副本: 傑理生化技術股份有限公司(修訂計畫同意書影本)(74147 台南市新市區南科二路 13 號 4 樓)、協同主持人: 吳益壽、王惠民

院長:  
承辦單位: 人體試驗審查委員會 行政室/醫務秘書:  
承辦人: 吳淑瑛 2015.8.17 分區負責投標  
電話: 6646 副院長: 謝院長莊嘉德執行  
單位主管: 李書欣 醫師 簽印  
院長: 鍾飲文 簽印

發文: 打字: 核對: 吳淑瑛 監印: 吳淑瑛 108 樓 樓號: \_\_\_\_\_

Protocol Title: The skin rash control and cosmetic effect of Hydrolyzed Soybean Extract (ANTI) for skin care after LASER treatment  
Board Meeting/Approval date: 2015-8<sup>th</sup>-IRB(I) / 7/Aug/2015  
IRB Number: KMUHIRB-2014-07-01(I)  
Protocol Number: ANTI-01  
Principal Investigator: Su-Shin Lee  
Co-Investigator: Yi-Chia Wu, Hui-Min Wang  
Above study is approved by the Institutional Review Board-I on 2015/7/11 and valid till 2016/7/10. The constitution and operation of this review board are according to the guidelines of GCP. According to GCP, IRB-I will have to review each clinical research case annually and decide whether continue it or not. Therefore, please send us your Annual Report one month before the expiry date.  
Sincerely yours,

Hsueh-Wei Yen  
Hsueh-Wei Yen, M.D.  
Chairman  
Institutional Review Board - I  
Kaohsiung Medical University  
Chung-Ho Memorial Hospital

37

財團法人私立高雄醫學大學附設中和紀念醫院 函

地址: 80756 高雄市三民區自由一路100號  
承辦人: 人體試驗審查委員會-吳淑瑛  
電話: (07)3121101 分機 6646 轉 37  
傳真: (07)3221408

受文者: 如正副本行文單位

發文日期: 中華民國 104 年 8 月 17 日  
發文字號: 高醫附委字第 1040003737 號  
類別: 普通件  
密等及解密條件或保密期限:  
附件: 見主旨

主旨: 檢送本院整型外科李書欣醫師主持之「以專利大豆萃取液(ANT 1)改善雷射後患部泛紅、灼熱及最終整體美白效果之評估」(IRB 編號: KMUHIRB-2014-07-01(I), 計畫編號: ANTI-01) 臨床試驗期中報告申請通過證明, 請核備。

說明:  
一、本業於高醫第一人體試驗審查委員會 2015 年第 8 次(2015/8/7)會議審核通過, 同意本臨床試驗之執行有效期限至: 2016/7/10。  
二、本院計畫主持人請於證書有效期限到期前一個月繳交期中報告; 臨床試驗計畫結束或中止後三個月內繳交結案或中止報告。如發生不良反應事件時須依相關法規填妥表格送相關單位(IRB), 以上相關資料請自本院人委會網站中下載。

正本: 衛生福利部食品藥物管理署(期中報告同意證明書影本)、本院計畫主持人: 李書欣醫師(期中報告同意證明書正本)  
副本: 傑理生化技術股份有限公司(期中報告同意證明書影本)、協同主持人: 吳益壽、王惠民

院長 鍾飲文

38  
39

40 **Figure S3.** IACUC certificate of animal examination (IACUC number: 105-141).

 國立中興大學  
National Chung Hsing University

國立中興大學實驗動物照護及使用委員會審查證明書  
Affidavit of Approval of Animal Use Protocol  
National Chung Hsing University

動物實驗申請表暨同意書編號 IACUC No. : 105-141

計畫申請人：王惠民 職稱：教授  
單位：生醫工程研究所 飼養/應用地點：動物醫學研究中心  
計畫名稱：蝦紅素用於美白、皮膚癌和傷口修復的綜合運用  
核發日期(Date of issue)：106.06.19 (06/19/2017)

本「動物實驗申請表」業經國立中興大學實驗動物照護及使用委員會依照動物保護法及環境保護法相關規定，實質審查形式審查通過。本研究計畫預定飼養應用之動物如下：

| 動物種類<br>Animal species | 動物數量<br>Number to be used | 飼養及使用期間<br>Period of care and use |
|------------------------|---------------------------|-----------------------------------|
| SD 大鼠                  | 60 隻                      | 106年08月01日至109年07月31日             |
| C57BL/6 小鼠             | 30 隻                      | 106年08月01日至109年07月31日             |
| BALB/c Nude 裸小鼠        | 60 隻                      | 106年08月01日至109年07月31日             |

**The animal use protocol listed below has been reviewed and approved by the Institutional Animal Care and Use Committee (IACUC).**

Protocol Title: Astaxanthin comprehensive utilization is used in whitening,wound healing and skin cancer.

IACUC Approval No: 105-141

Period of Protocol: Valid From: 08/01/2017 To: 07/31/2020 (mm/dd/yyyy)

Principal Investigator (PI): Graduate Institute of Biomedical Engineering, Hui-Min Wang,  
Professor

實驗動物照護及使用委員會 張天傑召集人  
IACUC Chairman

  


41

42

43 **Figure S4.** TAP-nanoemulsion inhibited lung metastatic melanoma through induction of apoptosis related proteins by  
44 Western blotting verification.

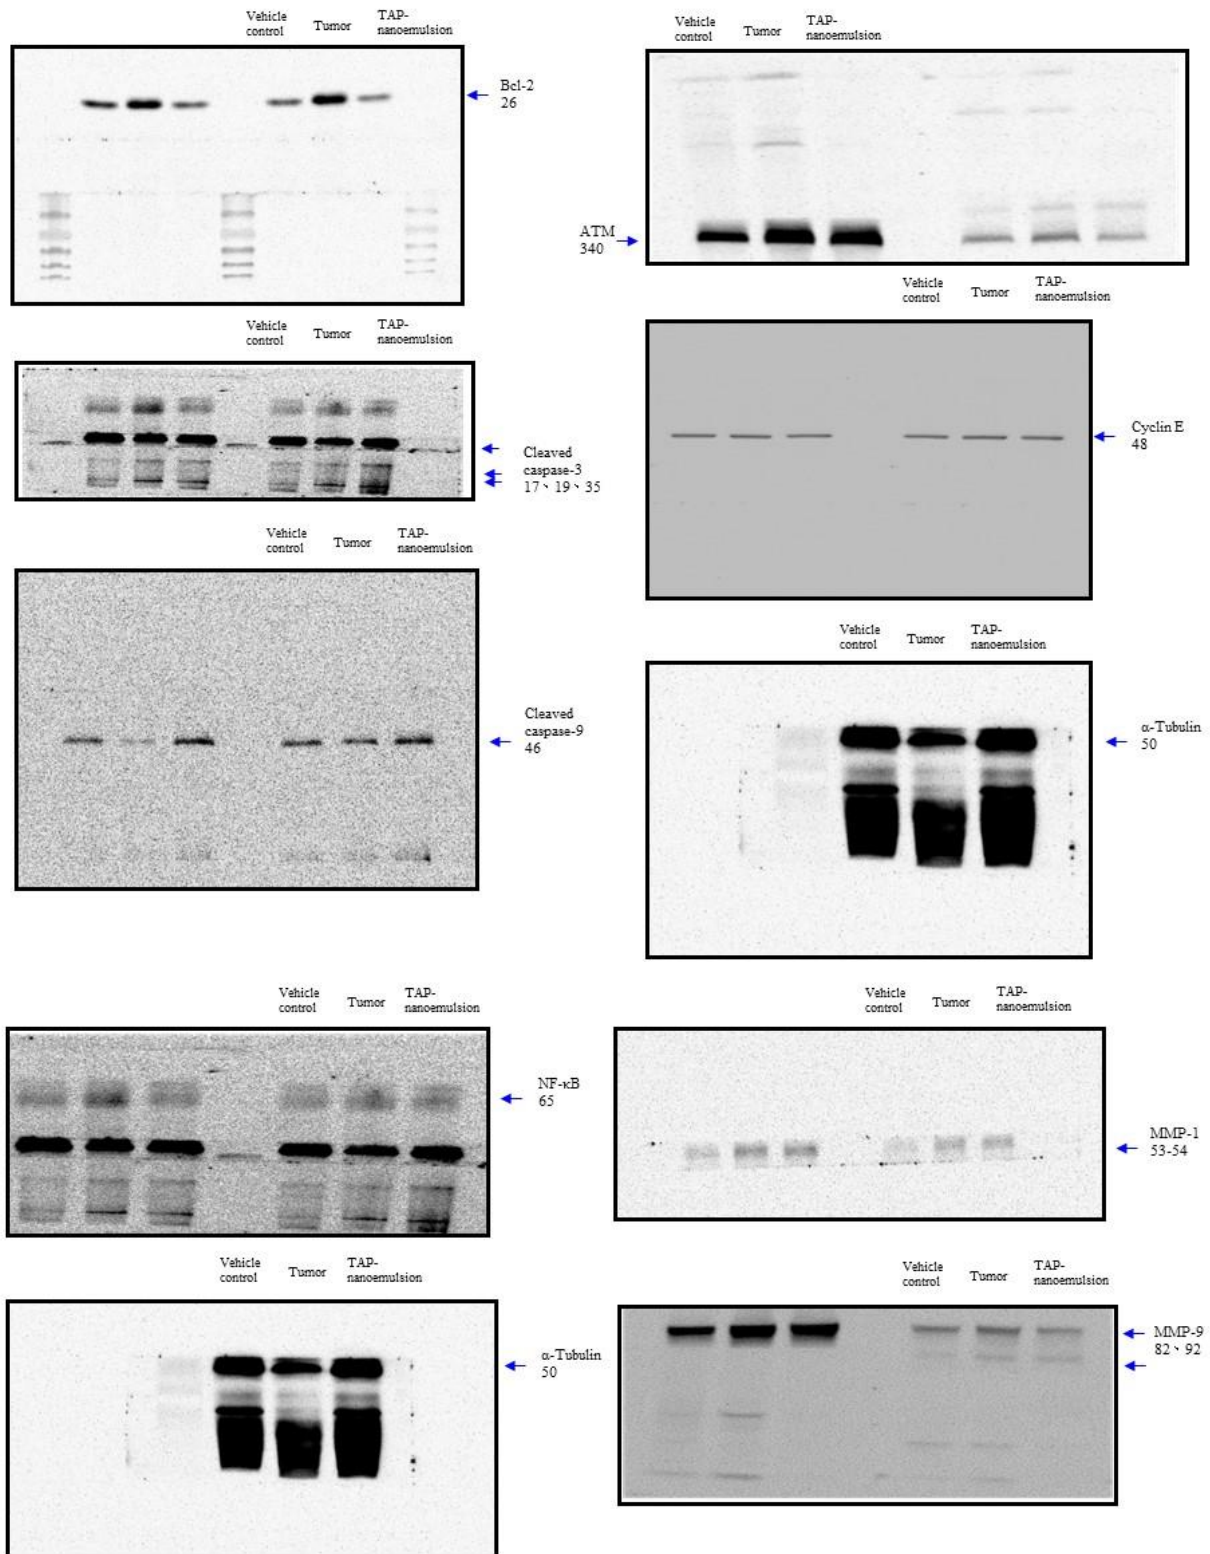

45

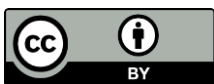

© 2020 by the authors. Submitted for possible open access publication under the terms and conditions of the Creative Commons Attribution (CC BY) license (<http://creativecommons.org/licenses/by/4.0/>).

46
